# Supplementary material
Source: publisher site journal article supplement (https://www.dovepress.com/article/499941)
Supplement: Supplementary file 1 [file get_supplementary_file.php]

**Table S1** Expert panel profiles

| **Name** | **Specialty** | **Qualification** | **Affiliation** | **Years of experience** |
| --- | --- | --- | --- | --- |
| Natalie Schellack | Pharmacology | Ph.D. (Pharmacy) | University of Pretoria | 24 years |
| Kitiyot Yotsombut | Pharmacy Practice | Ph.D. (Social and Administrative Pharmacy) M. Pharm (Clinical Pharmacy) | Chulalongkorn University | 18 years |
| Arman Sabet | Neurology | M.D. (Medicine) | Griffith University | 28 years |
| Jalal Nafach | Diabetes, Endocrinology and Metabolism | M.D.(Medicine) | Dubai Diabetes Centre | 23 years |
| Fu Liong Hiew | Neurology | MBBS (IMU)  MMed (S’Pore)  MRCP (UK) | Sunway Medical Centre | 18 years |
| Kongkiat Kulkantrakorn | Neurology | M.D. (Medicine) | Thammasat University | 32 years |

**Table S2** Search strategy

| **Topic** | **Subtopic** | **Keyword cluster 1** | **Keyword cluster 2** |
| --- | --- | --- | --- |
|  |
| Epidemiology | Burden of disease (prevalence, incidence, morbidity) | "Vitamin B6 OR Pyridoxine" AND "Deficiency" | "Prevalence OR incidence OR morbidity OR burden OR mortality OR cost OR economic cost" |  |
| Vitamin B6 clinical data | Evidence and efficacy | "Vitamin B6" OR "Pyridoxine" | "Efficacy" OR "Effectiveness" Or "Clinical evidence" |  |
| Safety and adverse effects | "Adverse events" OR "Adverse effects" OR "Safety" OR "Pharmacovigilance" OR "post-marketing report" OR "Surveillance" |  |
| Adverse effects mechanism | ("Adverse events" OR "Adverse effects") AND ("Mechanism of action" OR "MOA") |  |
| PK / PD data | "Pharmacokinetic" OR "Pharmacodynamic" OR "PKPD" |  |
| Clinical practice and treatment guideline | Clinical practice | "Clinical practice" OR "clinical management" OR "Treatment selection" |  |
| Treatment guidelines | "Treatment guidelines" OR "therapeutic guidelines" OR "clinical guidelines" OR "Place in therapy" OR "Treatment algorithm" |  |
| Regulatory statements | Regulatory statements | "Regulatory warning" OR "Regulatory labels" OR "Regulatory statements" OR "Safety updates" |  |
| Perception and awareness | HCP awareness | ("Healthcare professionals" OR "HCP" OR "clinicians") AND ("awareness") |  |
| HCP perception | ("Healthcare professionals" OR "HCP" OR "clinicians") AND ("perception" OR "attitudes" OR "beliefs" OR "perspective") |  |
| **Abbreviations***:* HCP, Health care professional; MOA, Mechanism of action; PD, Pharmacodynamics; PK, Pharmacokinetics. | | | |  |

| **Table S3** Initial consensus statements considered in the literature and references | | |
| --- | --- | --- |
| **No.** | **Consensus statement** | **References** |
| 1 | Vitamin B6 and its metabolites are essential for the functioning of the nervous system, as a coenzyme for metabolic reactions that is crucial for synthesis of neurotransmitters such as γ-aminobutyric-acid (GABA), dopamine, epinephrine and serotonin. ​ | Birch et al. (1935)1  Rioult-Pedotti et al. (2015)2  Gwak et al. (2011)3  Parra et al. (2018)4  Young et al. (2002)5 |
| 2 | Vitamin B6 deficiency may result in peripheral neuropathy, seborrheic dermatitis, microcytic anemia, dental decay, glossitis, seizures, depression, confusion and weakened immune function. | Abosamak et al. (2023)6  Parra et al. (2018)4  Snider et al. (1980)7  Muhamad et al. (2023)8  Raskin et al. (1965)9  Nair et al. (1976)10  Hoyumpa M et al. (1986)11  World Health Organization (2004)12  Ghavanini et al. (2014)13 |
| 3 | Clear dose and duration recommendations associated with neuropathy etiology, patient risk groups, or symptoms severity have not been established. Clinicians should carefully evaluate each patient’s individual condition when deciding dosage and duration. Based on published literature and expert clinical practices, the following tolerable (maximum) daily dosage and associated duration of vitamin B6 intake is recommended for peripheral neuropathy as shown in Table 2. | Institute of Medicine (US) Standing Committee on the Scientific Evaluation of Dietary Reference Intakes and its Panel on Folate, Other B Vitamins, and Choline (1998)14  National Health and Medical Research Council, Ministry of Health (2006)15  Bernstein et al. (1990)16  Pietrzik et al. (1991)17  Janka et al. (199118  Coughlin et al (2021)19  Therapeutic Goods Administration (TGA) (2022)20  Health Sciences Authority (HSA) (2023)21 |
| 4 | Vitamin B6-induced neurological adverse events have been reported in high therapeutic dose and long-term usage. However, these are generally rare and may be reversible upon treatment cessation when recognized early. Regular monitoring by healthcare professionals, screening for history of vitamin consumption is key to early detection of adverse events. | Vrolijk et al. (2020)22  Muhamad et al. (2023)8  Van Hunsel et al. (2018)23  Hadtstein et al. (2021)24  Vrolijk et al. (2017)25  Sathienluckana et al. (2024)26  Echaniz-Laguna et al. (2018)27  Kulkantrakorn et al. (2014)28  Visser et al. (2014)29  Dalton et al. (1987)30  Parry et al. (1985)31  Krishnan et al. (2023)32 |
| 5 | For patient usage duration of longer than 6 months, and over 50 mg/day vitamin B6, regular monitoring by healthcare professionals is recommended. If patients develop neurological side effects, a washout period of 20 ~ 40 days (3 ~ 6 weeks) is recommended before considering resuming vitamin B6 treatment. | Van Hunsel et al. (2018)23  Kulkantrakorn et al. (2014)28  Dalton et al. (1987)30  Zempleni et al. (1995)33  Echaniz-Laguna et al. (2018)27  Parry et al. (1985)31  Howland et al. (2009)34  Romano et al. (2019)35  Center for Drug Evaluation and Research (CDER) (2021)36  Committee for Medicinal Products for Human Use (CHMP) (2010) 37  Health Canada (2018)38  Vrolijk et al. (2020)22  Hadtstein et al. (2021)24 |

**References**

1. Birch TW, Gyorgy P, Harris LJ. The vitamin B(2) complex. Differentiation of the antiblacktongue and the “P.-P.” factors from lactoflavin and vitamin B(6) (so-called “rat pellagra” factor). Parts I-VI. *Biochem J*. 1935;29(12):2830-2850. doi:https://doi.org/10.1042/bj0292830
2. Rioult-Pedotti MS, Pekanovic A, Atiemo CO, Marshall J, Luft AR. Dopamine Promotes Motor Cortex Plasticity and Motor Skill Learning via PLC Activation. Beeler JA, ed. *PLOS ONE*. 2015;10(5):e0124986. doi:10.1371/journal.pone.0124986
3. Gwak YS, Hulsebosch CE. GABA and central neuropathic pain following spinal cord injury. *Neuropharmacology*. 2011;60(5):799-808. doi:10.1016/j.neuropharm.2010.12.030
4. Parra M, Stahl S, Hellmann H. Vitamin B6 and Its Role in Cell Metabolism and Physiology. *Cells*. 2018;7(7):84. doi:10.3390/cells7070084
5. Young N S, Leyton M. The role of serotonin in human mood and social interaction. Insight from altered tryptophan levels. *Pharmacol Biochem Behav*. 2002;71(4):857-865. doi:https://doi.org/10.1016/s0091-3057(01)00670-0
6. Abosamak N, Gupta V. Vitamin B6 (Pyridoxine). *StatPearls*. Published online August 17, 2023. <https://www.ncbi.nlm.nih.gov/books/NBK557436/>
7. Snider DE. Pyridoxine supplementation during isoniazid therapy. *Tubercle*. 1980;61(4):191-196. doi:10.1016/0041-3879(80)90038-0
8. Muhamad R, Akrivaki A, Papagiannopoulou G, Zavridis P, Zis P. The Role of Vitamin B6 in Peripheral Neuropathy: A Systematic Review. *Nutrients*. 2023;15(13):2823. doi:10.3390/nu15132823
9. Raskin NH, Fishman RA. Pyridoxine-Deficiency Neuropathy Due to Hydralazine. *N Engl J Med*. 1965;273(22):1182-1185. doi:10.1056/NEJM196511252732203
10. Nair S, Maguire W, Baron H, Imbruce R. The Effect of Cycloserine on Pyridoxine-Dependent Metabolism in Tuberculosis. *J Clin Pharmacol*. 1976;16(8-9). doi:https://doi.org/10.1002/j.1552-4604.1976.tb02419.x
11. Hoyumpa AM. Mechanisms of Vitamin Deficiencies in Alcoholism. *Alcohol Clin Exp Res*. 1986;10(6):573-581. doi:https://doi.org/10.1111/j.1530-0277.1986.tb05147.x
12. orld Health Organization, Food and Agriculture Organization of the United Nations. *Vitamin and Mineral Requirements in Human Nutrition*, 2nd edition. 2004. Available from <https://iris.who.int/bitstream/handle/10665/42716/9241546123.pdf?sequence=1> Accessed on 15 April 2024.
13. Ghavanini AA, Kimpinski K. Revisiting the Evidence for Neuropathy Caused by Pyridoxine Deficiency and Excess. *J Clin Neuromuscul Dis*. 2014;16(1):25-31. doi:10.1097/CND.0000000000000049
14. Institute of Medicine (US) Standing Committee on the Scientific Evaluation of Dietary Reference Intakes and its Panel on Folate, Other B Vitamins, and Choline. *Dietary Reference Intakes for Thiamin, Riboflavin, Niacin, Vitamin B6, Folate, Vitamin B12, Pantothenic Acid, Biotin, and Choline*. National Academies Press; 1998:6015. doi:10.17226/6015
15. National Health and Medical Research Council.  *Nutrient Reference Values for Australia and New Zealand: Including Recommended Dietary Intakes*. National Health and Medical Research Council ; Ministry of Health; 2006. Available from: [https://www.nhmrc.gov.au/about-us/publications/nutrient-reference-values-australia-and-new-zealand-including-recommended-dietary-intakes. Accessed 15 April 2024](https://www.nhmrc.gov.au/about-us/publications/nutrient-reference-values-australia-and-new-zealand-including-recommended-dietary-intakes.%20Accessed%2015%20April%202024).
16. Bernstein AL. Vitamin B 6 in Clinical Neurology. *Ann N Y Acad Sci*. 1990;585(1):250-260. doi:10.1111/j.1749-6632.1990.tb28058.x
17. Pietrzik K, Hages M. Risk/benefit evaluation of a high dose B vitamin therapy. *Steinkopff Verl Darmstadt*. Published online 1991:115-124.
18. Janka HU, Rietzel S, Mehnert H. The influence of neurobion on temperature sensibility in patients with diabetic polyneuropathy. In: *Pharmakologie Und Klinische Anwendung Hochdosierter B-Vitamine*. Steinkopff; 1991:87-97. <http://link.springer.com/10.1007/978-3-642-85410-1_9>. German.
19. Coughlin CR, Tseng LA, Abdenur JE, et al. Consensus guidelines for the diagnosis and management of pyridoxine‐dependent epilepsy due to α‐aminoadipic semialdehyde dehydrogenase deficiency. *J Inherit Metab Dis*. 2021;44(1):178-192. doi:10.1002/jimd.12332
20. Therapeutic Goods Administration (TGA). Health supplements containing vitamin B6 can cause peripheral neuropathy. 2022 November 10. Available from: <https://www.tga.gov.au/news/safety-alerts/health-supplements-containing-vitamin-b6-can-cause-peripheral-neuropathy>. Accessed April 15, 2024.
21. Health Sciences Authority (HSA). High-dose vitamin B6 and risk of peripheral neuropathy. 2023 May 15. Available from: https://www.hsa.gov.sg/announcements/safety-alert/high-dose-vitamin-b6-and-risk-of-peripheral-neuropathy. Accessed April 15, 2024.
22. Vrolijk MF, Hageman GJ, Van De Koppel S, Van Hunsel F, Bast A. Inter-individual differences in pharmacokinetics of vitamin B6: A possible explanation of different sensitivity to its neuropathic effects. *PharmaNutrition*. 2020;12:100188. doi:10.1016/j.phanu.2020.100188
23. Van Hunsel F, Van De Koppel S, Van Puijenbroek E, Kant A. Vitamin B6 in Health Supplements and Neuropathy: Case Series Assessment of Spontaneously Reported Cases. *Drug Saf*. 2018;41(9):859-869. doi:10.1007/s40264-018-0664-0
24. Hadtstein F, Vrolijk M. Vitamin B-6-Induced Neuropathy: Exploring the Mechanisms of Pyridoxine Toxicity. *Adv Nutr*. 2021;12(5):1911-1929. doi:10.1093/advances/nmab033
25. Vrolijk MF, Opperhuizen A, Jansen EHJM, Hageman GJ, Bast A, Haenen GRMM. The vitamin B6 paradox: Supplementation with high concentrations of pyridoxine leads to decreased vitamin B6 function. *Toxicol In Vitro*. 2017;44:206-212. doi:10.1016/j.tiv.2017.07.009
26. Sathienluckana T, Palapinyo S, Yotsombut K, Wanothayaroj E, Sithinamsuwan P, Suksomboon N. Expert consensus guidelines for community pharmacists in the management of diabetic peripheral neuropathy with a combination of neurotropic B vitamins. *J Pharm Policy Pract*. 2024;17(1):2306866. doi:10.1080/20523211.2024.2306866
27. Echaniz-Laguna A, Mourot-Cottet R, Noel E, Chanson JB. Regressive pyridoxine-induced sensory neuronopathy in a patient with homocystinuria. *BMJ Case Rep*. Published online June 28, 2018:bcr-2018-225059. doi:10.1136/bcr-2018-225059
28. Kulkantrakorn K. Pyridoxine-induced sensory ataxic neuronopathy and neuropathy: revisited. *Neurol Sci*. 2014;35(11):1827-1830. doi:10.1007/s10072-014-1902-6
29. Visser NA, Notermans NC, Degen LAR, De Kruijk JR, Van Den Berg LH, Vrancken AFJE. Chronic idiopathic axonal polyneuropathy and vitamin B6 : a controlled population‐based study. *J Peripher Nerv Syst*. 2014;19(2):136-144. doi:10.1111/jns5.12063
30. Dalton K, Dalton MJT. Characteristics of pyridoxine overdose neuropathy syndrome. *Acta Neurol Scand*. 1987;76(1):8-11. doi:10.1111/j.1600-0404.1987.tb03536.x
31. Parry GJ, Bredesen DE. Sensory neuropathy with low‐dose pyridoxine. *Neurology*. 1985;35(10):1466-1466. doi:10.1212/WNL.35.10.1466
32. Krishnan D, Kiernan MC. Neurotoxic risks from over‐the‐counter vitamin supplements. *Med J Aust*. 2023;218(7):304-306. doi:10.5694/mja2.51851
33. Zempleni J. Pharmacokinetics of vitamin B6 supplements in humans. *J Am Coll Nutr*. 1995;14(6):579-586. doi:10.1080/07315724.1995.10718546
34. Howland RH. Medication Holidays. *J Psychosoc Nurs Ment Health Serv*. 2009;47(9):15-18. doi:https://doi.org/10.3928/02793695-20090804-01
35. Romano S, Ferraldeschi M, Bagnato F, et al. Drug Holiday of Interferon Beta 1b in Multiple Sclerosis: A Pilot, Randomized, Single Blind Study of Non-inferiority. *Front Neurol*. 2019;10:695. doi:10.3389/fneur.2019.00695
36. Centre for Drug Evaluation and Research (CDER). Bioequivalence Studies With Pharmacokinetic Endpoints for Drugs Submitted Under an ANDA Guidance for Industry. 2021 August 20. Available from: <https://www.fda.gov/regulatory-information/search-fda-guidance-documents/bioequivalence-studies-pharmacokinetic-endpoints-drugs-submitted-under-abbreviated-new-drug?utm_medium=email&utm_source=govdelivery> Accessed 15 April 2024.
37. Committee for Medicinal Products for Human Use (CHMP). Guideline on the investigation of bioequivalence. 2010 January 20. Available from: <https://www.ema.europa.eu/en/documents/scientific-guideline/guideline-investigation-bioequivalence-rev1_en.pdf> Accessed 15 April 2024
38. Health Canada. Guidance Document: Conduct and Analysis of Comparative Bioavailability Studies. 2018 January 9. Available from: <https://www.canada.ca/content/dam/hc-sc/documents/services/drugs-health-products/drug-products/applications-submissions/guidance-documents/bioavailability-bioequivalence/conduct-analysis-comparative.pdf>. Accessed 15 April 2024
